# Supplementary material for: Enrichment of G2/M cell cycle phase in human pluripotent stem cells enhances HDR-mediated gene repair with customizable endonucleases
Source: PubMed Central journal article supplement (PMC4757933; doi:10.1038/srep21264), 2016-02-18
Supplement: srep21264-s1.pdf [file srep21264-s1.pdf]

**Enrichment of G2/M cell cycle phase in human pluripotent stem cells enhances HDR-mediated gene repair with customizable endonucleases.**

Diane Yang<sup>1, 7</sup>, Marissa Scavuzzo<sup>2, 7</sup>, Jolanta Chmielowiec<sup>3, 4</sup>, Robert Sharp<sup>3, 4</sup>, Aleksandar Bajic<sup>6</sup>, Malgorzata Borowiak<sup>1-5\*</sup>

<sup>1</sup> Molecular and Cellular Biology Department, Baylor College of Medicine, One Baylor Plaza, Houston, TX 77030, USA

<sup>2</sup> Program in Developmental Biology, Baylor College of Medicine, One Baylor Plaza, Houston, TX 77030, USA

<sup>3</sup> Stem Cells and Regenerative Medicine Center, Baylor College of Medicine, One Baylor Plaza, Houston, TX 77030, USA

<sup>4</sup> Center for Cell and Gene Therapy, Baylor College of Medicine, Texas Children's Hospital and Houston Methodist Hospital, Houston, TX 77030, USA

<sup>5</sup> McNair Medical Institute, Houston, TX 77030, USA

<sup>6</sup> Jan and Dan Duncan Neurological Research Institute, Texas Children's Hospital, 1250 Moursund Street, Houston, TX 77030

<sup>7</sup> equal contribution

\* Corresponding author: [borowiak@bcm.edu](mailto:borowiak@bcm.edu), phone +1 713 798 7771

Running title: Enhancing gene targeting in human PSCs by cell cycle manipulation

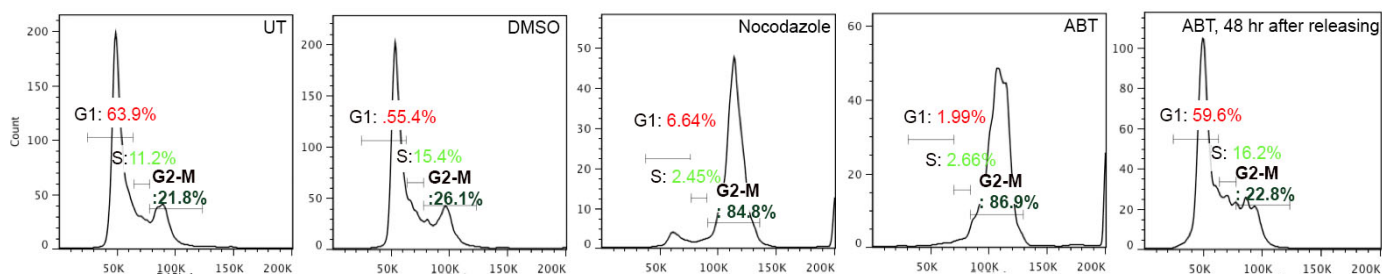

|          | UT         | DMSO       | Nocodazole | ABT        |
|----------|------------|------------|------------|------------|
| G1 (%)   | 59.13±4.88 | 63.83±9.08 | 4.27±1.89  | 4.37±3.11  |
| S (%)    | 11.67±1.15 | 10.87±1.97 | 1.6±0.36   | 1.57±0.35  |
| G2/M (%) | 28.8±4.45  | 24.7±8.22  | 90.73±1.56 | 91.43±3.29 |

**Supplementary Figure 1: Synchronized Fucci H9 cells detected measured by DNA content and flow cytometry.** Representative FACS plots of synchronized Fucci H9 cells stained with Hoechst show efficient G2/M arrest in ABT or Nocodazole treated cells as compared to untreated and DMSO vehicle control cells (Top panel). ABT treatment shows a reversible effect of cell cycle after 48 hours of releasing. Lower panel shows Mean ± standard deviation for percentage of each cell cycle phase ( $n=3$  biological replicates).

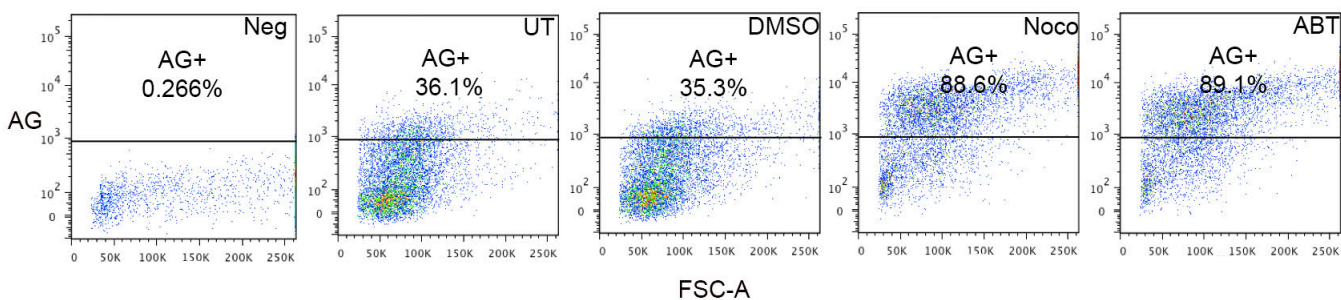

|        | UT          | DMSO       | Nocodazole | ABT       |
|--------|-------------|------------|------------|-----------|
| DN (%) | 45.07±27.43 | 59.93±1.01 | 7.33±0.67  | 7.4±0.61  |
| KO+(%) | 9.4±15.07   | 0.67±0.06  | 3.37±0.67  | 2.03±1.59 |
| AG+(%) | 38.23±8.41  | 34.4±1.31  | 88.43±0.38 | 88.6±0.7  |

**Supplementary Figure 2: G2/M cell cycle phase of Fucci H9 cells measured by AG fluorescence with and without synchronization using flow cytometry.** Representative FACS plots of synchronized Fucci H9 cells show efficient G2/M arrest by ABT or Nocodazole treated cells as compared to untreated and DMSO vehicle control cells (Top panel). Lower panel shows Mean ±

standard deviation for percentage of each cell cycle phase ( $n=3$  biological replicates). DN, double negative. KO, Kusabira orange. AG, Azami Green.

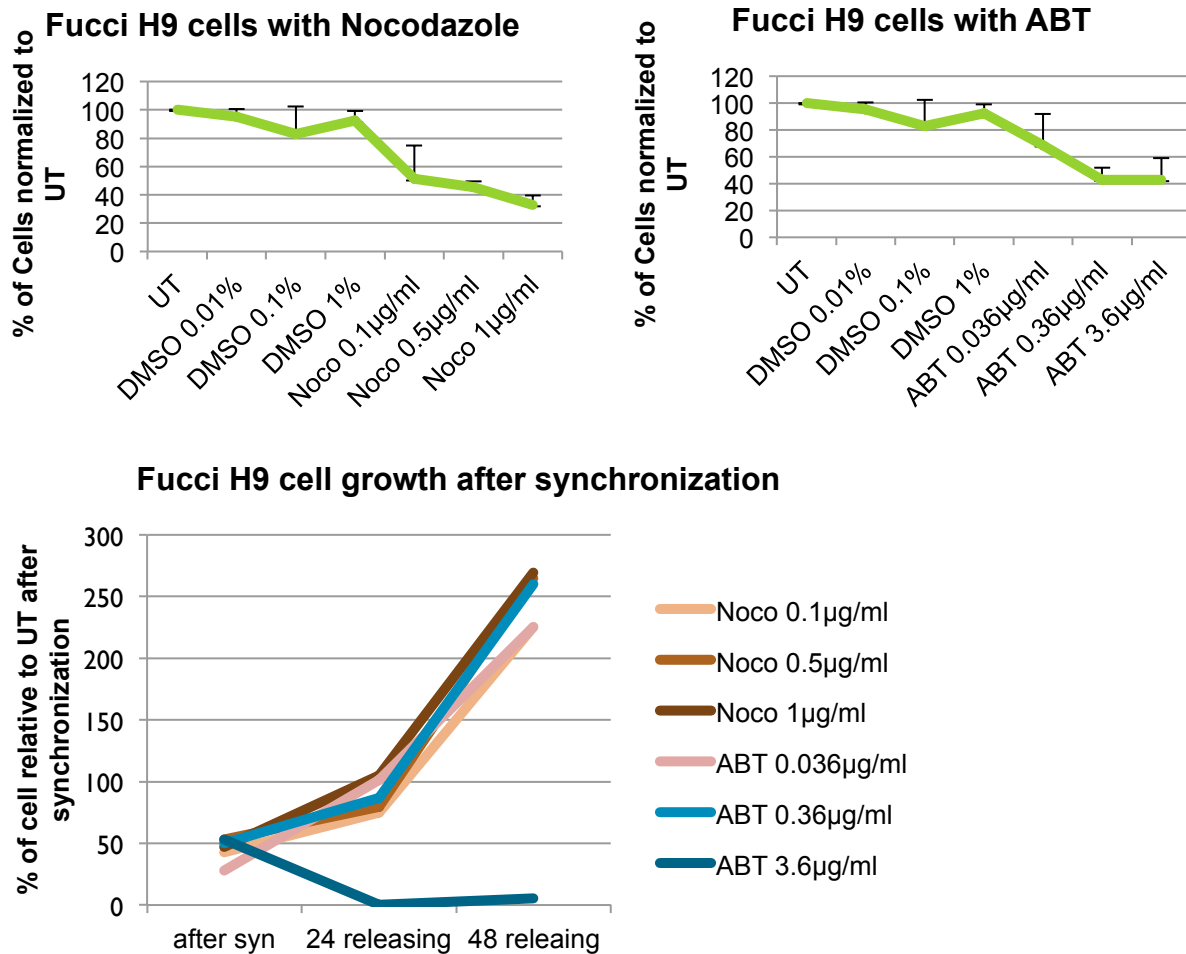

**Supplementary Figure 3: Cell survival rate after synchronization with Nocodazole and ABT.** Fucci H9 cell counts immediately after synchronization normalized to untreated cells show a decrease after treatment (Top panel,  $n=3$  biological replicates). Nocodazole and ABT induce reversible growth arrest and cells recover their number around 30hrs post synchronization as shown by survival and recover cure normalized to untreated cell number at 0 hours post synchronization (Lower panel). The high concentration of ABT (3.6  $\mu\text{g/ml}$ ) inhibits cell number recovery.

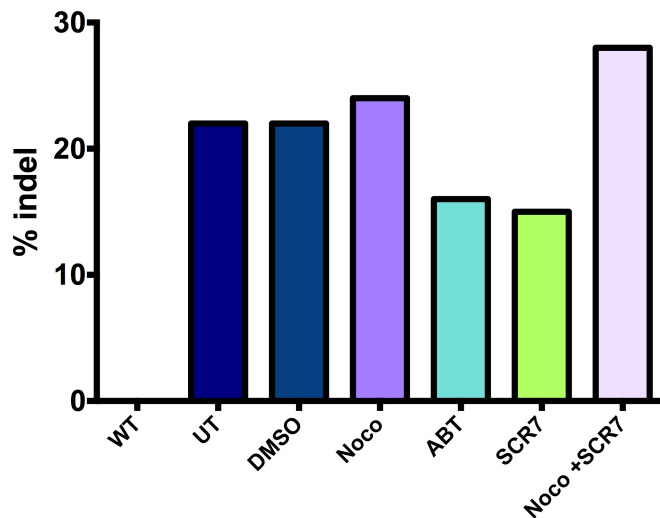

**Supplementary Figure 4: Quantification of indel formation after targeting of Oct4 using CRISPR/Cas9 in HEK293t cells.** CRISPR/Cas9 targeted region was amplified and indels were analyzed by T7 endonuclease assay in HEK293t untreated, DMSO vehicle treated, synchronized, and control untargeted cells.

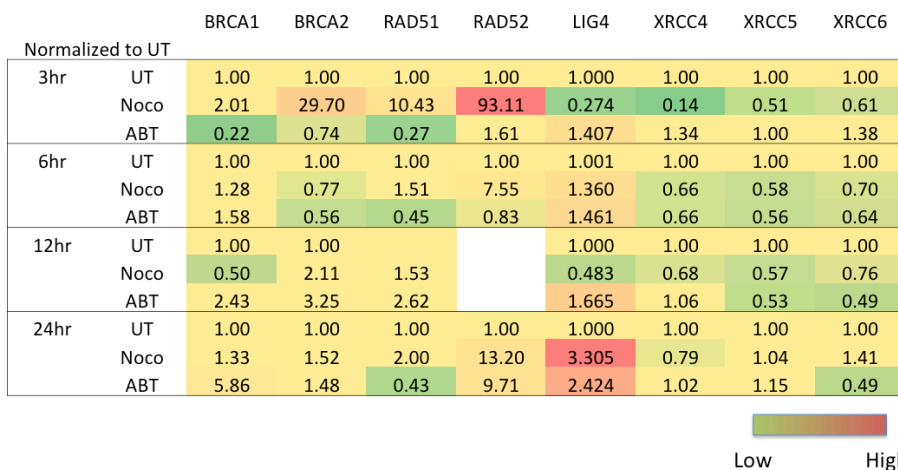

**Supplementary Figure 5: HR related (*BRCA1*, *BRCA2*, *RAD51*, *RAD52*) and NHEJ related (*LIG4*, *XRCC4*, *XRCC5* and *XRCC6*) gene expression detected by qPCR.** H1 synchronized cell gene expression analyzed by qPCR at 3, 6, 12, and 24 hours post nucleofection normalized to untreated cells ( $n=2$  technical replicates).

| Treatment    | G0/G1 (%)  | S (%)      | G2/M (%)   |
|--------------|------------|------------|------------|
| UT           | 46.73±5.66 | 21.4±6.95  | 30.57±4.92 |
| DMSO 1%      | 45.2±7.13  | 18±0.79    | 35.97±6.74 |
| DMSO 0.1%    | 47.77±6.56 | 18.9±0.7   | 32.67±6.82 |
| ABT 3.6µg/ml | 5.87±2.57  | 16.93±6.45 | 76.6±9.4   |

|                  |           |            |             |
|------------------|-----------|------------|-------------|
| ABT<br>0.36µg/ml | 6.5±4.16  | 15.97±8.08 | 77±12.99    |
| Noco 1µg/ml      | 5.07±2.23 | 13.5±2.65  | 81.43±5.25  |
| Noco<br>0.5µg/ml | 5.77±4.41 | 16.5±9.23  | 76.77±14.01 |

**Supplementary Table 1-** H1 hPSCs synchronized using different concentrations of Nocodazole and ABT (*n*=3 biological replicates). Data presented as Mean ± Standard deviation.

| Treatment /Releasing time (hr) | Treatment         | G1 (%)          | S (%)            | G2/M (%)          |
|--------------------------------|-------------------|-----------------|------------------|-------------------|
|                                | UT                | 52±8.66         | 27.6±1.67        | 18.07±7.04        |
|                                | DMSO              | 47.23±3.9       | 26.27±2.6        | 25.9±4.84         |
| 4/3                            | Nocodazole        | 25.53±1.1       | 26.83±1.15       | 48.83±1.81        |
|                                | ABT               | 24.37±1.63      | 27.47±1.35       | 46.57±0.21        |
| 4/1                            | Nocodazole        | 33.63±1.79      | 23.47±1.98       | 41.36±0.35        |
|                                | ABT               | 32.27±3.26      | 25.23±2.63       | 40.7±2.67         |
| 4/0                            | Nocodazole        | 34.6±2.05       | 23.2±0.87        | 40.13±2.05        |
|                                | ABT               | 38.07±0.86      | 22.8±0.72        | 36.73±1.18        |
| 16/3                           | Nocodazole        | 23.9±15.25      | 6.41±1.36        | 68.37±17.55       |
|                                | ABT               | 30.77±26.72     | 5.05±2.21        | 62.47±25.61       |
| <b>16/1</b>                    | <b>Nocodazole</b> | <b>5.7±1.18</b> | <b>2.17±0.46</b> | <b>91±1.25</b>    |
|                                | ABT               | 14.76±9.87      | 3.55±2.36        | 80.13±11.18       |
| <b>16/0</b>                    | Nocodazole        | 6.41±1.59       | 2.77±0.59        | 89.8±2.88         |
|                                | <b>ABT</b>        | <b>6.51±3.2</b> | <b>2.86±0.99</b> | <b>89.23±4.42</b> |
| 12/3                           | Nocodazole        | 11.64±8.83      | 2.75±0.66        | 84.43±9.79        |
|                                | ABT               | 21.82±24.49     | 2.32±0.66        | 74.73±25.69       |
| 12/1                           | Nocodazole        | 5.54±0.23       | 2.6±1.3          | 61.72±48.61       |
|                                | ABT               | 10.93±6.5       | 2.74±0.58        | 84.77±7.62        |
| 12/0                           | Nocodazole        | 8.34±2.41       | 3.27±1.58        | 84.53±2.54        |
|                                | ABT               | 6.23±2.94       | 3.23±1.38        | 89.13±4.52        |
| 18/3                           | Nocodazole        | 9.7± 6.29       | 3.4±1            | 86.1±7.31         |
|                                | ABT               | 14.13±5.23      | 5.72±2.45        | 79.47±7.48        |
| 18/1                           | Nocodazole        | 5.95±2.19       | 1.43±0.27        | 91.87±2.57        |
|                                | ABT               | 5.95±1.35       | 1.6±0.48         | 91.47±1.52        |
| 18/0                           | Nocodazole        | 6.83±3.85       | 2.04±0.82        | 90.37±4.7         |
|                                | ABT               | 8.25±3.01       | 1.74±0.23        | 89.27±2.68        |

**Supplementary Table 2-** H1 hPSCs with different synchronization and releasing time. Treatment and releasing time are annotated as Treatment/Releasing time (hr) ( $n=3$  biological replicates). Data presented as Mean  $\pm$  Standard deviation.

| Program | GFP+(%) | Viability |
|---------|---------|-----------|
| CA137   | 67.6    | ~60%      |
| CB150   | 37.4    | ~60%      |
| CD118   | 29.2    | ~80%      |
| CE118   | 28.6    | ~80%      |
| CM113   | 38.6    | ~80%      |
| DC100   | 66.3    | ~30%      |
| DN100   | 84.4    | ~20%      |

**Supplementary Table 3:** Various nucleofection programs were tested using 10ug pMAXGFP of  $2.5 \times 10^5$  of H1. GFP and cell viability was measured by FACS after 48 hours of nucleofection.

| Gene target        | Targeting method                      | Plasmid                                                                                                                          |
|--------------------|---------------------------------------|----------------------------------------------------------------------------------------------------------------------------------|
| <i>WNT5A</i>       | CRISPR; D10A Cas9; <i>S. pyogenes</i> | Targeting: pX335<br>Donor(s): PL452                                                                                              |
| <i>NEUROD1</i> 1-3 | CRISPR; Cas9; <i>S. pyogenes</i>      | Targeting: pX459<br>Donor(s): OCT4-2A-eGFP-PGK-Puro;<br>Kume_mKO1_pPL452loxP_EM7_PGK_neo                                         |
| <i>NEUROD1</i> 4-5 | CRISPR; Cas9; <i>N. meningitides</i>  | Targeting: pSimpleII-U6-tracr-U6-BsmBI-NLS-NmCas9-HA-NLS<br>Donor(s): OCT4-2A-eGFP-PGK-Puro;<br>Kume_mKO1_pPL452loxP_EM7_PGK_neo |
| NKX6.1             | ZFNs                                  | Targeting: PZFN1_Nkx6.1 and PZFN2_Nkx6.1<br>Donor(s): OCT4-2A-eGFP-PGK-Puro                                                      |
| <i>INS</i>         | CRISPR; Cas9<br>TALENs                | Targeting:<br>13ABPZVC_INS_TAL_3R_TALtrunc_FokI<br>Donor(s):<br>Kume_mKO1_pPL452loxP_EM7_PGK_neo                                 |
| <i>OCT4</i>        | CRISPR; Cas9; <i>S. pyogenes</i>      | Targeting: pX330<br>Donor(s): CMV-Brainbow-1.1M and Oct4-eGFP-PGK-Puro                                                           |

**Supplementary Table 4:** Plasmids for gene targeting method and donor plasmids for HDR. *NEUROD1* CRISPR/Cas9 are separated by species with sgRNA numbers corresponding to Supplementary Table 5.

| Gene target | Targeting strategy | Guide set | Direction | Sequence (5' to 3')               |
|-------------|--------------------|-----------|-----------|-----------------------------------|
|             | CRISPR nickase     | 1         | F         | CACCGTGCAGTTCCACCTTCGAT<br>GTCCG  |
|             | CRISPR nickase     | 1         | R         | AAACCCCGACATCGAAGGTGGA<br>ACTGCAC |

|             |                |    |   |                                                         |
|-------------|----------------|----|---|---------------------------------------------------------|
| WNT5A       | CRISPR nickase | 2  | F | CACCGTTTGGCAGGGTGATGCA<br>GATAGG                        |
|             | CRISPR nickase | 2  | R | AAACCCTATCTGCATCACCTGC<br>CAAAC                         |
|             | CRISPR nickase | 3  | F | CACCGTTCGATGTCGGAATTGAT<br>ACTGG                        |
|             | CRISPR nickase | 3  | R | AAACCCAGTATCAATTCCGACAT<br>CGAAC                        |
|             | CRISPR nickase | 4  | F | CACCGGTGGATAACACCTCTGTT<br>TTTGG                        |
|             | CRISPR nickase | 4  | R | AAACCCAAAAACAGAGGTGTTAT<br>CCACC                        |
| NEUR<br>OD1 | CRISPR         | 1  | F | CACCGAGCCACGGATCAATCTT<br>CTC                           |
|             | CRISPR         | 1  | R | AAACGAGAAGATTGATCCGTGGT<br>CC                           |
|             | CRISPR         | 2  | F | CACCGGCACTATCCTGCAGCGA<br>CAC                           |
|             | CRISPR         | 2  | R | AAACGTGTGCTGCAGGATAGT<br>GCC                            |
|             | CRISPR         | 3  | F | CACCGGCACTATCCTGCAGCGA<br>CAC                           |
|             | CRISPR         | 3  | R | AAACGTGTGGCTGCAGGATAGT<br>GCC                           |
|             | CRISPR         | 4  | F | GAGCCCTTCTTTGAAAGCCCTCT                                 |
|             | CRISPR         | 4  | R | AGAGGGCTTTCAAAGAAGGGCT<br>C                             |
|             | CRISPR         | 5  | F | AGTGCCAGCTCAATGCCATATT                                  |
|             | CRISPR         | 5  | R | AATATGGCATTGAGCTGGGCACT                                 |
| NKX6.1      | ZFN            | 1  | - | CTCTACTTCAGCCCCAGnnCCGC<br>GGCCGTGGCCGCCGG              |
|             | ZFN            | 2  | - | GGACGCCCATCTTCTGnCCGG<br>AGTGATGCAGAGCC                 |
|             | ZFN            | 3  | - | <b>CTGGCCGGACGCCCATCTTcNnG<br/>GCCCGGAGTGATGCAGAGCC</b> |
|             | ZFN            | 4  | - | CCGGTACCCCAAGCCGCnnGCT<br>GAGCTGCCTGGCCGGC              |
|             | ZFN            | 5  | - | CGGACGCCCATCTTCTGnnCCG<br>GAGTGATGCAGAGCC               |
|             | ZFN            | 6  | - | TACTTCAGCCCCAGCGCCGCnnC<br>CGTGGCCGCCGTGGGCCGG          |
|             | ZFN            | 7  | - | CTGGCCGGACGCCCATCTTCTn<br>GCCCGGAGTGATGCA               |
|             | ZFN            | 8  | - | CGCCGTGGGCCGGTACCCCAAn<br>nCGCTGGCTGAGCTG               |
|             | ZFN            | 9  | - | CCGGTACCCCAAGCCGCTGGnn<br>GAGCTGCCTGGCCGGC              |
|             | ZFN            | 10 | - | CGTGGGCCGGTACCCCAAGCnn<br>CTGGCTGAGCTGCCTG              |
|             | ZFN            | 11 | - | GGCCGCCGTGGGCCGGTACCnn<br>AAGCCGCTGGCTGAGT              |

|      |        |    |   |                                                 |
|------|--------|----|---|-------------------------------------------------|
|      | ZFN    | 12 | - | CCTGGCCGGACGCCCATCTTnT<br>GGCCCGGAGTGATGCAGAG   |
|      | ZFN    | 13 | - | GGCCGCCGTGGGCCGGTACCCn<br>AAGCCGCTGGCTGAGT      |
|      | ZFN    | 14 | - | GACGCCCATCTTCTGGCCCCn<br>GTGATGCAGAGCCCCGCC     |
|      | ZFN    | 15 | - | CTGGCCGGACGCCCATCnnCTG<br>GCCCGGAGTGATGCAG      |
|      | ZFN    | 16 | - | CGGACGCCCATCTTCTGGCCn<br>GAGTGATGCAGAGCCCCGCCCT |
| INS  | TALENs | 1  | F | TCTGCTCCCTCTACCAGCT                             |
|      | TALENs | 1  | R | TAGACGCAGCCCGCAGGCA                             |
| OCT4 | CRISPR | 1  | F | CACCGCTCTCCCATGCATTCAA<br>CTGAGG                |
|      | CRISPR | 1  | R | AAACCCTCAGTTTGAATGCATGG<br>GAGAGC               |

**Supplementary Table 5:** Guide sequences for gene targeting.

| Gene target                          | Chromosomal location         | Sequence                                                                                                                                                                                                                                                                                                                                                                                                                                            |
|--------------------------------------|------------------------------|-----------------------------------------------------------------------------------------------------------------------------------------------------------------------------------------------------------------------------------------------------------------------------------------------------------------------------------------------------------------------------------------------------------------------------------------------------|
| <i>WNT5A</i> first constitutive exon | chr3:55,513,341-55,513,466   | atgcagtacatcggagaaggcgcaagacag<br>gcatcaaagaatgccagatcaatt <b>ccgacatcg</b><br><b>aagggtggaactgca</b> gactgtggataaacacctt<br>gttt <b>ttggcagggtgatgcagatagg</b> cagccgag<br>agacggccttcacatacgcggtgagcgcagca<br>ggggtggtgaacgcatgagccgggctgccc<br>cgaggggcagctgtccacctgaggctg                                                                                                                                                                       |
| <i>NEUROD1</i> , exon 1              | chr2:182,540,833-182,545,392 | <b>acgcctacagcgcagcgtggagcccttctt</b><br><b>tgaagccctctgactgattgcaccagccctt</b><br><b>cctttgatggaccctcagccgcccgtcag</b><br><b>catcaatggcaacttctcttcaaacacgaac</b><br><b>cgccgcccagcttgagaaaattatgccttta</b><br><b>ccatgcaactcctgcagcgcactggcagg</b><br><b>ggcccaaagccacggatcaatctctcaggc</b><br><b>accgctgcccctcgtgcgagatcccatag</b><br><b>acaatattatgtccttcgatagccattcacatc</b><br><b>atgagcagctcatgagtgccagctcaatgc</b><br><b>catattcatgattag</b> |
| <i>NKX6.1</i> , 3' of exon 1         | chr4:85,403,140-85,429,603   | gcgccgctggccgcccgtggccggtaccccaa<br>gccgctggctgagctgc <b>ctggtggccggacgcc</b><br><b>catcttctggcccgg</b> agtgatgcagagcccgcc<br>tgaggggacgcacgcctggcctgtaccctcgtg<br>agtac                                                                                                                                                                                                                                                                            |
| INS                                  | chr11:2,171,009-2,192,571    | tggggcaggtggagctggcgggggccctggt<br>gcaggcagcctgcagccctggccctggaggg<br>gtccctgcagaagcgtggcattgtggaacaatgc<br>tgtaccagca <b>tctgctcccttaccagct</b> ggagaa<br>ctactgcaact <b>tagacgcagcccgcaggcagcc</b><br>ccacaccgcccctcctgcaccgagagagat<br>ggaataaagccctgaaccagc                                                                                                                                                                                     |



|      |                                        |                                                                                                                                            |
|------|----------------------------------------|--------------------------------------------------------------------------------------------------------------------------------------------|
| OCT4 | chr6_ssto_hap7:2,4<br>67,051-2,473,404 | cctcggtcctttccctgagggggaagccttccc<br>cctgtctctgtcaccactctgggcttccatgcatt<br>caactgagggcctgcccttaggaatggggg<br>acagggggaggggaggagctagggaaag |
|------|----------------------------------------|--------------------------------------------------------------------------------------------------------------------------------------------|

**Supplementary Table 6:** Genomic location of targeting. Red sequence shows complementary sequence binding targeting guides.

| Homologous arms of donor                             | Sequence                                                                                                                                                                                                                                                                                                                                                                                                                                                                                                                                                                                                                                                                                                                                                                                                                                                                                       | Mutated sgRNA binding site      |
|------------------------------------------------------|------------------------------------------------------------------------------------------------------------------------------------------------------------------------------------------------------------------------------------------------------------------------------------------------------------------------------------------------------------------------------------------------------------------------------------------------------------------------------------------------------------------------------------------------------------------------------------------------------------------------------------------------------------------------------------------------------------------------------------------------------------------------------------------------------------------------------------------------------------------------------------------------|---------------------------------|
| <i>WNT5a</i> left homology arm, guides 1 & 2; 3 & 4  | CGTCATGGTACCCCTCACAATCACATAAGGA<br>GCCCTTTTAAAATGTCAAGAAACATGGTGAAT<br>TTTCTCCAGTCTGTATACTTGTCCCTCTGTTC<br>TTCCATCAGTCAAAGGAACTGCTATCTCCTA<br>CCCGTATCTAATTGTGTCTACTTTCAGCATT<br>ATAAGTTTTCAAGGCAGATTGGTCCAATTTGT<br>GGGGCAAAGTGGGTCACTTTCTCTAATGTCA<br>GAGGCCTGTCCCTCAAAGTCTGTTTCCTCC<br>TTTTCTGAGTGGATTTTGGAAATACTGGTTCA<br>GGTATATGGTGACAGGGGCTAGGAAGGGAG<br>TGAAAATACTAACTGAGGAGCCAGATGGCAG<br>GATGGGGACTGCACAATACCTCCGTTTTCTG<br>AGTGCAGTTTAAACAGAGGAGTTTTATGAAG<br>CCTTTCTCATACTTTGTCATGAGGACAAGCA<br>GGAGAGAAAAAAGCATCTGTGTGCTTAAAC<br>TATGTATTGCTGACATGCTTTCAGGGGGCCC<br>ACCTCGAGATTTACGTAATCTTGAATGCAC<br>ATCTCCCCCCTTGCAGGTCGCTAGGTATGA<br>ATAACCCTGTTTCAGATGTCAGAAGTATATATT<br>ATAGGAGCACAGCCTCTCTGCAGCCAAGTGG<br>CAGGACTTTCTCAAGGACAGAAGAACTGTG<br>CCACTTGTATCAGGACCACATGCAGTACATC<br>GGAGAAGGCGCGAAGACAGGCATCAAAGAA<br>TGAATGTTTTCAATTATCACATCCTTGGTGGAA<br>CTGCAGCAGTCGACCTAGCTG | ATCACATC<br>CTTGGTGG<br>AACTGCA |
| <i>WNT5a</i> right homology arm, guides 1 & 2; 3 & 4 | GTCAGTAAGCGGCCCGCCTGTGGATAACACC<br>GTGGTTTTGAACAGGGTGTGCTTATTAATAG<br>GAAAACATTTAAAATATTTTTTTAAAACATTAA<br>CTTTTTTTCCTAGAAGAAATCCTTAGCATTAC<br>TTCATGCTTGATAGAAAGCATGAAGGAGGAT<br>GCCTTCCAGCTCGGGTGGTGGCTTGGGCATT<br>TTTGTCAATTATAGCAAATGATGTTAATTCCTGT<br>CCCTACACCTGATGATAAGTTTTGGATTTTAA<br>TCAAATCAGGAGGCAAGTATCACAGACACCT<br>TCATTTTTGCAAACACTTAATTTTTCTATAAAG<br>CATTTTGTTTAAAATAGAAGCAGAACACTTAT<br>TTTGGTTTCTTAAGAGTAGGTGGGGGAAGCA<br>AGTCATGTATATGCTTTTAAACGTGAACTC<br>TCTTGCCTGTTAGTTTTTAAAGCCACAATTGA<br>AACGGCCCAGCATCGAACTAAAAGTTGCCG                                                                                                                                                                                                                                                                                                                                             | TTGAACAG<br>GGTGATGC<br>TTATTAA |

|                                                                  |                                                                                                                                                                                                                                                                                                                                                                                                                                                                                                                                                                                                                                                                                                                                                                                                                                     |                                         |
|------------------------------------------------------------------|-------------------------------------------------------------------------------------------------------------------------------------------------------------------------------------------------------------------------------------------------------------------------------------------------------------------------------------------------------------------------------------------------------------------------------------------------------------------------------------------------------------------------------------------------------------------------------------------------------------------------------------------------------------------------------------------------------------------------------------------------------------------------------------------------------------------------------------|-----------------------------------------|
|                                                                  | <p>TCTTTTAGAATCCTGGATATATTGAAAGTGAA<br/> CAAAGTTTTAATTTTCCTAATAGAACTATTTCC<br/> TGAGGCTATAAAGATATAGACGTTAAAAGCTT<br/> TATTTTTAGTCCCAGAAAGAATTTAATTA<br/> GTGATCCAATTTATGTTTGTGATGTCAGCAAT<br/> TGATATAATAAAAGCACATGCTTGGGATGTCA<br/> ACCTAGGAACCTGAAAAAAAAAATTAAGAGTAT<br/> TGCTCACAGTCCGATTCTTCATTTTAAATACG<br/> TTGTTGAATGTCTTACTTCCCCATTCAAAGAG<br/> ATAGCATTTCAAATGGGCTAAAGGCAAAGATT<br/> TTAAAAATCTAGTAATGATAGTGAGATCCAG<br/> ACATGATAAGATACATTGATGAGTTTGGACAA<br/> ACCACAACCTAGAATGCAGTGAAAAAATGCTT<br/> TATTTGTGAAATTTGTGATGCTATTGCTTTATT<br/> TGTAACCATTATAAGCTGCAATAACAAGTTC<br/> CGCGGCTATGAC</p>                                                                                                                                                                                                                         |                                         |
| <p><i>NEUROD1</i><br/> left homology<br/> arm, guide 1</p>       | <p>TTAATTggatccATGAAGGCTAACGCCCGGGAG<br/> CGGAACCGCATGCACGGACTGAACGCGGCG<br/> CTAGACAACCTGCGCAAGGTGGTGCCTTGCT<br/> ATTCTAAGACGCAGAAGCTGTCCAAAATCGA<br/> GACTCTGCGCTTGGCCAAGA ACTACATCTGG<br/> GCTCTGTGCGGAGATCCTGCGCTCAGGCAAAA<br/> GCCCAGACCTGGTCTCCTTCGTT CAGACGCT<br/> TTGCAAGGGCTTATCCCAACCCACCACCAAC<br/> CTGGTTGCGGGCTGCCTGCAACTCAATCCTC<br/> GGACTTTTCTGCCTGAGCAGAACCAGGACAT<br/> GCCCCCCACCTGCCGACGGCCAGCGCTTC<br/> CTTCCCTGTACACCCCTACTCCTACCAGTCG<br/> CCTGGGCTGCCAGTCCGCCTTACGGTACCA<br/> TGGACAGCTCCCATGTCTTCCACGTTAAGCC<br/> TCCGCCGCACGCCTACAGCGCAGCGCTGGA<br/> GCCCTTCTTTGAAAGCCCTCTGACTGATTGC<br/> ACCAGCCCTTCCTTTGATGGACCCCTCAGCC<br/> CGCCGCTCAGCATCAATGGCAACTTCTCTTT<br/> CAAACACGAACCGTCCGCCGAGTTTGAGAAA<br/> AATTATGCCTTTACCATGCACTATCCTGCAGC<br/> GACACTGGCAGGGGCCCAAAGCCACGGATC<br/> AATCTTtgctagcTTAATT</p> | <p>AGCCACGG<br/> ATCAATCTT<br/> tgc</p> |
| <p><i>NEUROD1</i><br/> right<br/> homology<br/> arm, guide 1</p> | <p>TTAATTggcgcgccCTCAGGCACCGCTGCCCT<br/> CGCTGCGAGATCCCCATAGACAATATTATGT<br/> CCTTCGATAGCCATTCACATCATGAGCGAGT<br/> CATGAGTGCCCAGCTCAATGCCATATTTT<br/> GATTAGAGGCACGCCAGTTTCACCATTTCCG<br/> GGAACGAACCCACTGTGCTTACAGTGACTG<br/> TCGTGTTTACAAAAGGCAGCCCTTTGGGTAC<br/> TACTGCTGCAAAGTGCAAATACTCCAAGCTTC<br/> AAGTGATATATGTATTTATTGTCATTACTGCCT<br/> TTGGAAGAAACAGGGGATCAAAGTTCCTGTT<br/> CACCTTATGTATTATTTTCTATAGCTCTTCTAT<br/> TTAAAAATAAAAAAATACAGTAAAGTTTAAAA<br/> AATACACCACGAATTTGGTGTGGCTGTATTCA<br/> GATCGTATTAATTATCTGATCGGGATAACAAA</p>                                                                                                                                                                                                                                                                                       | <p>ttaattggcgcg<br/> ccCTC</p>          |

|                                                                  |                                                                                                                                                                                                                                                                                                                                                                                                                                                                                                                                                                                                                                                                                                                                                                                                                                          |                                         |
|------------------------------------------------------------------|------------------------------------------------------------------------------------------------------------------------------------------------------------------------------------------------------------------------------------------------------------------------------------------------------------------------------------------------------------------------------------------------------------------------------------------------------------------------------------------------------------------------------------------------------------------------------------------------------------------------------------------------------------------------------------------------------------------------------------------------------------------------------------------------------------------------------------------|-----------------------------------------|
|                                                                  | <p>ATCACAAGCAATAATTAGGATCTATGCAATTT<br/> TTAAACTAGTAATGGGCCAATTTAAAATATATA<br/> TAAATATATATTTTTCAACCAGCATTTTACTAC<br/> TTGTTACCTTTCCCATGCTGAATTATTTTGTTG<br/> TGATTTTGTACAGAATTTTAAATGACTTTTAT<br/> AATGTGGATTTCCCTATTTTAAAACCATGCAGC<br/> TTCATCAATTTTATACATATCgcggccgcTTAAT<br/> T</p>                                                                                                                                                                                                                                                                                                                                                                                                                                                                                                                                                 |                                         |
| <p><i>NEUROD1</i><br/> left homology<br/> arm, guide 2</p>       | <p>TTAATTggatccACTAAGGCTCGCCTGGAGCGT<br/> TTTAAATTGAGACGCATGAAGGCTAACGCCC<br/> GGGAGCGGAACCGCATGCACGGACTGAACG<br/> CGGCGCTAGACAACCTGCGCAAGGTGGTGC<br/> CTTGCTATTCTAAGACGCAGAAGCTGTCCAA<br/> AATCGAGACTCTGCGCTTGGCCAAGA ACTAC<br/> ATCTGGGCTCTGTTCGGAGATCCTGCGCTCAG<br/> GCAAAGCCCAGACCTGGTCTCCTTCGTTCA<br/> GACGCTTTGCAAGGGCTTATCCCAACCCACC<br/> ACCAACCTGGTTGCGGGCTGCCTGCAACTCA<br/> ATCCTCGGACTTTTCTGCCTGAGCAGAACCA<br/> GGACATGCCCCCCCACCTGCCGACGGCCAG<br/> CGCTTCCTTCCCTGTACACCCCTACTCCTAC<br/> CAGTCGCCTGGGCTGCCAGTCCGCCTTAC<br/> GGTACCATGGACAGCTCCCATGTCTTCCACG<br/> TTAAGCCTCCGCCGCACGCCTACAGCGCAG<br/> CGCTGGAGCCCTTCTTTGAAAGCCCTCTGAC<br/> TGATTGCACCAGCCCTTCCTTTGATGGACCC<br/> CTCAGCCCGCCGCTCAGCATCAATGGCAACT<br/> TCTCTTTCAAACACGAACCGTCCGCCGAGTT<br/> TGAGAAAAATTATGCCTTTACCATGCACTATC<br/> CTGCAGCGAtggctagcTTAATT</p>    | <p>GCACTATC<br/> CTGCAGCG<br/> Atgg</p> |
| <p><i>NEUROD1</i><br/> right<br/> homology<br/> arm, guide 2</p> | <p>TTAATTggcgccgcccACTGGCAGGGGGCCCAAAG<br/> CCACGGATCAATCTTCTCAGGCACCGCTGCC<br/> CCTCGCTGCGAGATCCCCATAGACAATATTA<br/> TGTCCTTCGATAGCCATTCACATCATGAGCG<br/> AGTCATGAGTGCCCAGCTCAATGCCATATTT<br/> CATGATTAGAGGCACGCCAGTTTCACCATTT<br/> CCGGGAAACGAACCCACTGTGCTTACAGTGA<br/> CTGTCTGTTTTACAAAAGGCAGCCCTTTGGG<br/> TACTACTGCTGCAAAGTGCAAATACTCCAAG<br/> CTTCAAGTGATATATGTATTTATTGTCATTACT<br/> GCCTTTGGAAGAAACAGGGGATCAAAGTTCC<br/> TGTTACCTTATGTATTATTTTCTATAGCTCTT<br/> CTATTTAAAAAATAAAAAAATACAGTAAAGTTT<br/> AAAAAATACACCACGAATTTGGTGTGGCTGTA<br/> TTCAGATCGTATTAATTATCTGATCGGGATAA<br/> CAAATCACAGCAATAATTAGGATCTATGCA<br/> ATTTTTAACTAGTAATGGGCCAATTTAAAATAT<br/> ATATAAATATATATTTTTCAACCAGCATTTTAC<br/> TACTTGTTACCTTTCCCATGCTGAATTATTTG<br/> TTGTGATTTTGTACAGAATTTTAAATGACTTTT<br/> TATAATGTGGATTTCCCTATTTTAgcggccgcTTAA<br/> TT</p> | <p>ttaattggcgcg<br/> ccCAC</p>          |

|                                                               |                                                                                                                                                                                                                                                                                                                                                                                                                                                                                                                                                                                                                                                                                                                                                                                                                   |                                          |
|---------------------------------------------------------------|-------------------------------------------------------------------------------------------------------------------------------------------------------------------------------------------------------------------------------------------------------------------------------------------------------------------------------------------------------------------------------------------------------------------------------------------------------------------------------------------------------------------------------------------------------------------------------------------------------------------------------------------------------------------------------------------------------------------------------------------------------------------------------------------------------------------|------------------------------------------|
| <p><i>NEUROD1</i><br/>left homology<br/>arm, guide 3</p>      | <p>TTAATTggatccGATGAGGACCTGGAAGAGGAG<br/>GAAGAAGAGGAAGAGGAGGATGACGATCAA<br/>AAGCCCAAGAGACGCGGCCCCAAAAAGAAG<br/>AAGATGACTAAGGCTCGCCTGGAGCGTTTTA<br/>AATTGAGACGCATGAAGGCTAACGCCCGGGA<br/>GCGGAACCGCATGCACGGACTGAACGCGGC<br/>GCTAGACAACCTGCGCAAGGTGGTGCCTTGC<br/>TATTCTAAGACGCAGAAGCTGTCCAAAATCG<br/>AGACTCTGCGCTTGGCCAAGAACTACATCTG<br/>GGCTCTGTCGGAGATCCTGCGCTCAGGCAAA<br/>AGCCAGACCTGGTCTCCTTCGTTCAGACGC<br/>TTTGCAAGGGCTTATCCCAACCCACCACCAA<br/>CCTGGTTGCGGGCTGCCTGCAACTCAATCCT<br/>CGGACTTTTCTGCCTGAGCAGAACCAGGACA<br/>TGCCCCCCCACCTGCCGACGGCCAGCGCTT<br/>CCTTCCCTGTACACCCCTACTCCTACCAGTC<br/>GCCTGGGCTGCCAGTCCGCCTTACGGTAC<br/>CATGGACAGCTCCCATGTCTTCCACGTTAAG<br/>CCTCCGCCGCACGCCTACAGCGCAGCGCTG<br/>GAGCCCTTCTTTGAAAGCCCTCTGACTGATT<br/>GCACCAGCCCTTCTTTGATGGACCCCTCAG<br/>CCCGCCGCTCAGCATggctagcTTAATT</p>  | <p>AGCCCGCC<br/>GCTCAGCA<br/>Tggc</p>    |
| <p><i>NEUROD1</i><br/>right<br/>homology<br/>arm, guide 3</p> | <p>TTAATTggcgcgccCAATGGCAACTTCTCTTTCA<br/>AACACGAACCGTCCGCCGAGTTTGAGAAAAA<br/>TTATGCCTTTACCATGCACTATCCTGCAGCGA<br/>CACTGGCAGGGGCCCAAAGCCACGGATCAA<br/>TCTTCTCAGGCACCGCTGCCCTCGCTGCGA<br/>GATCCCATAGACAATATTATGTCCTTCGATA<br/>GCCATTCACATCATGAGCGAGTCATGAGTGC<br/>CCAGCTCAATGCCATATTTTCATGATTAGAGGC<br/>ACGCCAGTTTCACCATTTCCGGGAAACGAAC<br/>CCACTGTGCTTACAGTGACTGTCGTGTTTACA<br/>AAAGGCAGCCCTTTGGGTACTACTGCTGCAA<br/>AGTGCAAATACTCCAAGCTTCAAGTGATATAT<br/>GTATTTATTGTCATTACTIONGCTTTGGAAGAAA<br/>CAGGGGATCAAAGTTCCTGTTACCTTATGTA<br/>TTATTTTCTATAGCTCTTCTATTTAAAAAATAA<br/>AAAAATACAGTAAAGTTTAAAAAATACACCAC<br/>GAATTTGGTGTGGCTGTATTCAGATCGTATTA<br/>ATTATCTGATCGGGATAACAAAATCACAAGCA<br/>ATAATTAGGATCTATGCAATTTTTAACTAGTA<br/>ATGGGCCAATTAATAATATATAAATATATATT<br/>TTTCAACCAGCATTACTACTTGgcgggccgcTT<br/>AATT</p> | <p>ttaattggcgcg<br/>ccCAA</p>            |
| <p><i>NEUROD1</i><br/>left homology<br/>arm, guide 4</p>      | <p>TTAATTggatccGAGGACGACCTCGAAACCATG<br/>AACGCAGAGGAGGACTCACTGAGGAACGGG<br/>GGAGAGGAGGAGGACGAAGATGAGGACCTG<br/>GAAGAGGAGGAAGAAGAGGAAGAGGAGGAT<br/>GACGATCAAAAGCCCAAGAGACGCGGCCCC<br/>AAAAAGAAGAAGATGACTAAGGCTCGCCTGG<br/>AGCGTTTTAAATTGAGACGCATGAAGGCTAA<br/>CGCCCGGGAGCGGAACCGCATGCACGGACT</p>                                                                                                                                                                                                                                                                                                                                                                                                                                                                                                                   | <p>GAGCCCTT<br/>CTTTGAAA<br/>GCCCGgc</p> |

|                                                                  |                                                                                                                                                                                                                                                                                                                                                                                                                                                                                                                                                                                                                                                                                                                                                                                                                                                       |                                            |
|------------------------------------------------------------------|-------------------------------------------------------------------------------------------------------------------------------------------------------------------------------------------------------------------------------------------------------------------------------------------------------------------------------------------------------------------------------------------------------------------------------------------------------------------------------------------------------------------------------------------------------------------------------------------------------------------------------------------------------------------------------------------------------------------------------------------------------------------------------------------------------------------------------------------------------|--------------------------------------------|
|                                                                  | <p>GAACGCGGGCGCTAGACAACCTGCGCAAGGT<br/> GGTGCCTTGCTATTCTAAGACGCAGAAGCTG<br/> TCCAAAATCGAGACTCTGCGCTTGGCCAAGA<br/> ACTACATCTGGGCTCTGTGCGGAGATCCTGCG<br/> CTCAGGCCAAAAGCCCAGACCTGGTCTCCTTC<br/> GTTCAGACGCTTTGCAAGGGCTTATCCCAAC<br/> CCACCACCAACCTGGTTGCGGGCTGCCTGC<br/> AACTCAATCCTCGGACTTTTCTGCCTGAGCA<br/> GAACCAGGACATGCCCCCCCACCTGCCGAC<br/> GGCCAGCGCTTCCTTCCCTGTACACCCCTAC<br/> TCCTACCAGTCGCCTGGGCTGCCCAGTCCG<br/> CCTTACGGTACCATGGACAGCTCCCATGTCT<br/> TCCACGTTAAGCCTCCGCCGCACGCCTACAG<br/> CGCAGCGCTGGAGCCCTTCTTTGAAAGCCCg<br/> gctagcTTAATT</p>                                                                                                                                                                                                                                                                                              |                                            |
| <p><i>NEUROD1</i><br/> right<br/> homology<br/> arm, guide 4</p> | <p>TTAATTggcgcgccTCTGACTGATTGCACCAGCC<br/> CTTCCTTTGATGGACCCCTCAGCCCGCCGCT<br/> CAGCATCAATGGCAACTTCTCTTTCAAACACG<br/> AACCGTCCGCCGAGTTTGAGAAAAATTATGC<br/> CTTTACCATGCACTATCCTGCAGCGACTG<br/> GCAGGGGCCCAAAGCCACGGATCAATCTTCT<br/> CAGGCACCGCTGCCCTCGCTGCGAGATCC<br/> CCATAGACAATATTATGTCCTTCGATAGCCAT<br/> TCACATCATGAGCGAGTCATGAGTGCCCAGC<br/> TCAATGCCATATTTTCATGATTAGAGGCACGCC<br/> AGTTTCACCATTTCCGGGAAACGAACCCACT<br/> GTGCTTACAGTGAAGTGTGTTTACAAAAG<br/> GCAGCCCTTTGGGTACTACTGCTGCAAAGTG<br/> CAAATACTCCAAGCTTCAAGTGATATATGTAT<br/> TTATTGTCATTACTGCCTTTGGAAGAAACAGG<br/> GGATCAAAGTTCCTGTTACCTTATGTATTAT<br/> TTTCTATAGCTCTTCTATTTAAAAAATAAAAAA<br/> ATACAGTAAAGTTTAAAAAATACACCACGAAT<br/> TTGGTGTGGCTGTATTCAGATCGTATTAATTA<br/> TCTGATCGGGATAACAAAATCACAAGCAATAA<br/> TTAGGATCTATGCAATTTTTAAACTAGTAATG<br/> GGCCAATTAATAATgcggccgcTTAATT</p> | <p>ttaattggcgcg<br/> ccTCT</p>             |
| <p><i>NEUROD1</i><br/> left homology<br/> arm, guide 5</p>       | <p>TTAATTggatccAGACGCAGAAGCTGTCCAAAA<br/> TCGAGACTCTGCGCTTGGCCAAGAACTACAT<br/> CTGGGCTCTGTGCGGAGATCCTGCGCTCAGG<br/> CAAAGCCCAGACCTGGTCTCCTTCGTTTCAG<br/> ACGCTTTGCAAGGGCTTATCCCAACCCACCA<br/> CCAACCTGGTTGCGGGCTGCCTGCAACTCAA<br/> TCCTCGGACTTTTCTGCCTGAGCAGAACCAG<br/> GACATGCCCCCCCACCTGCCGACGGCCAGC<br/> GCTTCCTTCCCTGTACACCCCTACTCCTACCA<br/> GTCGCCTGGGCTGCCCAGTCCGCCTTACGG<br/> TACCATGGACAGCTCCCATGTCTTCCACGTT<br/> AAGCCTCCGCCGCACGCCTACAGCGCAGCG<br/> CTGGAGCCCTTCTTTGAAAGCCCTCTGACTG<br/> ATTGCACCAGCCCTTCTTTGATGGACCCCT<br/> CAGCCCGCCGCTCAGCATCAATGGCAACTTC</p>                                                                                                                                                                                                                                                                           | <p>AGTGCCCA<br/> GCTCAATG<br/> CCATagc</p> |

|                                                                  |                                                                                                                                                                                                                                                                                                                                                                                                                                                                                                                                                                                                                                                                                                                                                                                                                                             |                                                                           |
|------------------------------------------------------------------|---------------------------------------------------------------------------------------------------------------------------------------------------------------------------------------------------------------------------------------------------------------------------------------------------------------------------------------------------------------------------------------------------------------------------------------------------------------------------------------------------------------------------------------------------------------------------------------------------------------------------------------------------------------------------------------------------------------------------------------------------------------------------------------------------------------------------------------------|---------------------------------------------------------------------------|
|                                                                  | <p>TCTTTCAAACACGAACCGTCCGCCGAGTTTG<br/> AGAAAAATTATGCCTTTACCATGCACTATCCT<br/> GCAGCGACACTGGCAGGGGCCAAAGCCAC<br/> GGATCAATCTTCTCAGGCACCGCTGCCCTC<br/> GCTGCGAGATCCCATAGACAATATTATGTC<br/> CTTCGATAGCCATTCACATCATGAGCGAGTC<br/> ATGAGTGCCCAGCTCAATGCCATagctagcTTA<br/> ATT</p>                                                                                                                                                                                                                                                                                                                                                                                                                                                                                                                                                                |                                                                           |
| <p><i>NEUROD1</i><br/> right<br/> homology<br/> arm, guide 5</p> | <p>TTAATTggcgcgccATTTTCATGATTAGAGGCACG<br/> CCAGTTTCACCATTTCGGGAAACGAACCCA<br/> CTGTGCTTACAGTGA CTGTGTTTACAAAA<br/> GGCAGCCCTTTGGTACTACTGCTGCAAAGT<br/> GCAAATACTCCAAGCTTCAAGTGATATATGTA<br/> TTTATTGTCATTACTGCCTTTGGAAGAAACAG<br/> GGGATCAAAGTTCCTGTTACCTTATGTATTA<br/> TTTTCTATAGCTCTTCTATTTAAAAAATAAAAA<br/> AATACAGTAAAGTTTAAAAAATACACCACGAA<br/> TTTGGTGTGGCTGTATTCAGATCGTATTAATT<br/> ATCTGATCGGGATAACAAAATCACAAGCAATA<br/> ATTAGGATCTATGCAATTTTTAACTAGTAAT<br/> GGGCCAATTAATAATATAAATATATATTTT<br/> TCAACCAGCATTTTACTACTTGTACCTTTCC<br/> CATGCTGAATTATTTGTTGTGATTTTGTACA<br/> GAATTTTAAATGACTTTTTATAATGTGGATTTC<br/> CTATTTTAAACCATGCAGCTTCATCAATTTT<br/> ATACATATCAGAAAAGTAGAATTATATCTAATT<br/> TATACAAAATAATTTAACTAATTTAAACCAGCA<br/> GAAAAGTGCTTAGAAAGTTATTGTGTTGCCTT<br/> AGCACTTCTTTCCTCTCCAATTGTAAAAAAA<br/> gcgccgcTTAATT</p> | <p>ttaattggcgcg<br/> ccATT</p>                                            |
| <p><i>NKX6.1</i>, left<br/> homology<br/> arm, ZFN 3</p>         | <p>AGCCAGGGATCGAATCTAGGACTCGCGGAA<br/> CGAAAGGACTGCCTAGCCCGCCGGGACGCC<br/> TGCTTTTCTCGGCGAGCTGCCGCCTCCCGCG<br/> TGGAGGGTTTGGACATCTCTGCTGCGCAGCT<br/> AGGCGAGCAACTCCCGGCAGCGGCATTTTTG<br/> GTTTCAAGTTGGCAGCTCGCCTCCGGGCGCGC<br/> CGAGTGCCTCTCCGCTCGCGCCCTCGGCGC<br/> TTCCGGCTCCTCTGAGCCCCGCGGGGGGCA<br/> CCAGCCAGCGCCCTCGCTGCAAGGCTACGG<br/> TCTCCGGCGTGGCCGTGGGATGTTAGCGGT<br/> GGGGGCAATGGAGGGCACCCGGCAGAGCG<br/> CATTCTGCTCAGCAGCCCTCCCCTGGCCGC<br/> CCTGCACAGCATGGCCGAGATGAAGACCCC<br/> GCTGTACCCTGCCGCGTATCCCCCGCTGCCT<br/> GCCGGCCCCCCTCCTCCTCGTCTCGTCTGT<br/> CGTCTCCTCGTCCGCTCCCGCCTCTGG<br/> GCACCCACAACCCAGGCGGCCTGAAGCCCC<br/> CGGCCACGGGGGGGCTCTCATCCCTCGGCA<br/> GCCCCCGCAGCAGCTCTCGGCCGCCACCC<br/> CACACGGCATCAACGATATCCTGAGCCGGCC<br/> CTCCATGCCCGTGGCCTCGGGGGCCGCCCT<br/> GCCCTCCGCTCGCCCTCCGGTTCCTCCTCC</p>                 | <p>CTGGCCGG<br/> ACGCCCAT<br/> CTtctggCCC<br/> GGAGTGAT<br/> GCAGAGCC</p> |

|                                                    |                                                                                                                                                                                                                                                                                                                                                                                                                                                                                                                                                                                                                                                                                                                                                                                                                                                                                                                                                                         |                                                                           |
|----------------------------------------------------|-------------------------------------------------------------------------------------------------------------------------------------------------------------------------------------------------------------------------------------------------------------------------------------------------------------------------------------------------------------------------------------------------------------------------------------------------------------------------------------------------------------------------------------------------------------------------------------------------------------------------------------------------------------------------------------------------------------------------------------------------------------------------------------------------------------------------------------------------------------------------------------------------------------------------------------------------------------------------|---------------------------------------------------------------------------|
|                                                    | <p>TCCTCTTCCTCGTCCGCCTCTGCCTCCTCCG<br/> CCTCTGCCGCCGCCGCCGGCTGCTGCCGCCGG<br/> CCGCAGCCGCCGCCCTCATCCCCGGCCGGGC<br/> TGCTGGCCGGACTGCCACGCTTTAGCAGCCT<br/> GAGCCCGCCGCCGCCGCCGCCGGGCTCTA<br/> CTTCAGCCCCAGCGCCGCCGCCGTGGCCGC<br/> CGTGGGCCGGTACCCCAAGCCGCTGGCTGA<br/> GCTGCCTGGCCGGACGCCCATCTtctggGCTA<br/> GC</p>                                                                                                                                                                                                                                                                                                                                                                                                                                                                                                                                                                                                                                                         |                                                                           |
| <p>NKX6.1, right<br/> homology<br/> arm, ZFN 3</p> | <p>CCCGGAGTGATGCAGAGCCCCGCCCTGGAGG<br/> GACGCACGCCTGGCCTGTACCCCTCGTGAG<br/> TACTACCACCCGCGCCCCGATGCCTGCCTGC<br/> CGTGCCTGTTCTGCCACTCCCGGGTCCGC<br/> GCCCTGGTGTGCATGCCGCTCAGTCCATCC<br/> TGTGGCCCGCCCCAGTAGTTTGACAGCGCC<br/> GGAATCACACCAGTTAGGTTGGGCCAGGGCT<br/> TCCAGAAAGGGATTCTCGCTTTTCTGAGCTC<br/> GCGTGGCTGTATCCAAGCGCCTCCCTCTCTC<br/> TAAGTCTTGAGTACGCCTGGGCTGAGCCGGT<br/> GTGTGTGTGTTTCGTGTGGACCACAACGCGT<br/> GAGGGACGTGTGTCTCGTCCGAGGCCCTGG<br/> CTGTTCCCTGAAACGGCCTGGCCAGGACCGC<br/> AGGCCTGGCCTGGATTAGAAAGATGGGGAG<br/> GAGAGGGGAGGAGAGGCCACTGCATCTCTG<br/> CTTTCCCGGCTCCTCCCTGTCCGAGCGCCC<br/> CATTCCGCCTTCGCCAGCCTAACCGCTGCCT<br/> CTCTTGAAGCAGTGAGGCCCGGCAGCGGT<br/> GAGCCCTCCACCGCCCCGGGAAGTGAGTGTA<br/> TTTGCATGCACGTCTCCGCCTGGGGTGCCCC<br/> ACCTCACCTCTTCGCCCTCGCCGCCCGAGTA<br/> CACTCGGCCTGGGTGAGCCCATTGAAGACA<br/> GTCCAGCGTCCCCAGGGCAGGGCGAGCGCT<br/> TCCAGCCGCTCACCAGCGCTGGGCCCGCGC<br/> TTTCCACCTGCCTCCACTCTGGGGGCTGGC<br/> ACACGCTGCGTCCGGGCA</p> | <p>CTGGCCGG<br/> ACGCCCAT<br/> CTtctggCCC<br/> GGAGTGAT<br/> GCAGAGCC</p> |
| <p>INS left<br/> homology<br/> arm</p>             | <p>GCCGCCCCAGCCACCCCTGCTCCTGGCG<br/> CTCCCACCCAGCATGGGCAGAAGGGGGCAG<br/> GAGGCTGCCACCCAGCAGGGGGTCAGGTGC<br/> ACTTTTTTAAAAAGAAGTTCTCTTGGTCACGT<br/> CCTAAAAGTGACCAGCTCCCTGTGGCCAGT<br/> CAGAATCTCAGCCTGAGGACGGTGTTGGCTT<br/> CGGCAGCCCCGAGATACATCAGAGGGTGGG<br/> CACGCTCCTCCCTCCACTCGCCCCTCAAACA<br/> AATGCCCCGCAGCCATTTCTCCACCCTCAT<br/> TTGATGACCGCAGATTCAAGTGTTTTGTAAAG<br/> TAAAGTCCTGGGTGACCTGGGGTCACAGGGT<br/> GCCCCACGCTGCCTGCCTCTGGGCGAACAC<br/> CCCATCACGCCCGGAGGAGGGCGTGGCTGC<br/> CTGCCTGAGTGGGCCAGACCCCTGTCGCCA<br/> GGCCTCACGGCAGCTCCATAGTCAGGAGAT<br/> GGGAAGATGCTGGGGACAGGCCCTGGGGA<br/> GAAGTACTGGGATCACCTGTTCAAGGCTCCCA</p>                                                                                                                                                                                                                                                                                                                             | -                                                                         |

|                                     |                                                                                                                                                                                                                                                                                                                                                                                                                                                                                                                                                                                                                                                                                                                                                                                                                                                                                                                                                                                                                                                                                                                                                                                 |                                               |
|-------------------------------------|---------------------------------------------------------------------------------------------------------------------------------------------------------------------------------------------------------------------------------------------------------------------------------------------------------------------------------------------------------------------------------------------------------------------------------------------------------------------------------------------------------------------------------------------------------------------------------------------------------------------------------------------------------------------------------------------------------------------------------------------------------------------------------------------------------------------------------------------------------------------------------------------------------------------------------------------------------------------------------------------------------------------------------------------------------------------------------------------------------------------------------------------------------------------------------|-----------------------------------------------|
|                                     | <p>CTGTGACGCTGCCCCGGGGCGGGGGAAGGA<br/> GGTGGGACATGTGGGCGTTGGGGCCTGTAG<br/> GTCCACACCCAGTGTGGGTGACCCTCCCTCT<br/> AACCTGGGTCCAGCCCGGCTGGAGATGGGT<br/> GGGAGTGCGACCTAGGGCTGGCGGGCAGG<br/> CGGGCACTGTGTCTCCCTGACTGTGTCCTCC<br/> TGTGTCCCTCTGCCTCGCCGCTGTTCCGGAA<br/> CCTGCTCTGCGCGGCACGTCCTGGCAGTGG<br/> GGCAGGTGGAGCTGGGCGGGGGCCCTGGT<br/> GCAGGCAGCCTGCAGCCCTTGGCCCTGGAG<br/> GGGTCCCTGCAGAAGCGTGGCATTGTGGAA<br/> CAATGCTGTACCAGCATCTGCTCCCTCTACC<br/> AGCTGGAGAACTACTGCAAC</p>                                                                                                                                                                                                                                                                                                                                                                                                                                                                                                                                                                                                                                                                                                   |                                               |
| <i>INS</i> right<br>homology<br>arm | <p>TAGACGCAGCCCGCAGGCAGCCCCACACCC<br/> GCCGCCTCCTGCACCGAGAGAGATGGAATAA<br/> AGCCCTTGAACCAGCCCTGCTGTGCCGTCTG<br/> TGTGTCTTGGGGGCCCTGGGCCAAGCCCCA<br/> CTTCCCGGCACTGTTGTGAGCCCCTCCCAGC<br/> TCTCTCCACGCTCTCTGGGTGCCACAGGTG<br/> CCAACGCCGGCCAGGCCCAGCATGCAGTGG<br/> CTCTCCCCAAGCGGCCATGCCTGTCGGCTG<br/> CCTGCTGCCCCCACCCTGTGGCTCAGGGTC<br/> CAGTATGGGAGCTGCGGGGGTCTCTGAGGG<br/> GCCAGGGGTGGTGGGGCCACTGAGAAGTGA<br/> CTTCTTGTTCACTAGCTCTGGACTCTTGGAGT<br/> CCCCAGAGACCTTGTTCAAGAAAGGGAATGA<br/> GAACATTCCAGCAATTTTCCCCCACCTAGC<br/> CCTCCAGGTTCTATTTTTAGAGTTATTTCTG<br/> ATGGAGTCCCTGTGGAGGGAGGAGGCTGGG<br/> CTGAGGGAGGGGGTCTGCAGGGCGGGGG<br/> GCTGGGAAGGTGGGGAGAGGCTGCCGAGAG<br/> CCACCCGCTATCCCCAGCTCTGGGCAGCCC<br/> CGGGACAGTCACACACCCTGGCCTCGCGGC<br/> CCAAGCTGGCAGCCGTCTGCAGCCACAGCTT<br/> ATGCCAGCCCAGGTCCAGCCAGACACCTGA<br/> GGGACCCACTGGTGCCTTGGAGGAAGCAGG<br/> AGAGGTCAGATGGCACCATGAGCTGGGGCA<br/> GGTGCAGGGACCGTGGCAGCACCTGGCAGG<br/> GCCTCAGAACCCATGCCTTGGGCACCCCGG<br/> CCATGAGGCCCTGAGGATTGCAGCCCAGGA<br/> GAAGCAGGGAACCGCCAGGGCCACAGGGGC<br/> AGAGACCAGGGCCAGGGTCCCCCTGCAGCC<br/> CCTTAGCCCACCCCTCCCAGTAAGCAGGGC<br/> TGCTTGGCTGGCTTCCTTTGCTACAGACCTG<br/> CTGCT</p> | -                                             |
| <i>OCT4</i> left<br>homology<br>arm | <p>ACTAGTAACGGCCGCCAGTGTGCTGGAATTC<br/> GCCCTTTTCTGCAGGTCCCACCTGCACAGA<br/> TATGCAAAGCAGAAACCCTCGTGCAGGCCCG<br/> AAAGAGAAAGCGAACCAGTATCGAGAACCGA<br/> GTGAGAGGCAACCTGGAGAATTTGTTCTTGC<br/> AGTGCCCGAAACCCACACTGCAGCAGATCAG<br/> CCACATCGCCAGCAGCTTGGGCTCGAGAA</p>                                                                                                                                                                                                                                                                                                                                                                                                                                                                                                                                                                                                                                                                                                                                                                                                                                                                                                               | <p>GCTCTCCC<br/> ATGCATTC<br/> AAAC/tgagg</p> |



|                               |                                                                                                                                                                                                                                                                                                                                                                                                                                                                                                                                                                                                                                                                                                                                                                                                                                                              |                                  |
|-------------------------------|--------------------------------------------------------------------------------------------------------------------------------------------------------------------------------------------------------------------------------------------------------------------------------------------------------------------------------------------------------------------------------------------------------------------------------------------------------------------------------------------------------------------------------------------------------------------------------------------------------------------------------------------------------------------------------------------------------------------------------------------------------------------------------------------------------------------------------------------------------------|----------------------------------|
|                               | GGATGTGAGTGCCATGTCTCTCTGCGGGCTC<br>CATCTCTTTCCCCTGTCACCACCTCGCTTTCC<br>CTAGCTCTGGCTCCTCCAAGTCTCTAGGGC<br>TGTTGGCTTTGGACAGAATGTCCAAGCAGTC<br>AGGCCTGTCTCAGCTCATTCTCTAATGTCTC<br>CTCTAACTGCTCTAGGGCTGTTGGCTTTGGA<br>TAGAATGTCCAAGCAGAGTCAGGCCCGTCTC<br>AGCTCATTGTCTAATGTCATTCTCCTTTCTGT<br>CATTCACTTGCAGGTGGTCCGAGTGTGGTTC<br>TGTAACCGGCGCCAGAAGGGCAAGCGATCA<br>AGCAGCGACTATGCACAACGAGAGGATTTTG<br>AGGCTGCTGGGTCTCCTTTCTCAGGGGGACC<br>AGTGTCTTTCTCTGGCCCCAGGGCCCCAT<br>TTTGGTACCCAGGCTATGGGAGCCCTCACT<br>TCACTGCACTGTA CTCTCGGTCCCTTTCCCT<br>GAGGGGGAAGCCTTTCCCCCTGTCTCCGTCA<br>CCTCTGGGCTCTCCCATGCATTCAAAC                                                                                                                                                                                                                                                    |                                  |
| OCT4 right<br>homology<br>arm | GGTGCCTGCCCTTCTAGGAATGGGGGACAG<br>GGGGAGGGGAGGAGCTAGGGAAAGAAAACC<br>TGGAGTTTGTGCCAGGGTTTTTGGGATTAAG<br>TTCTTCATTACTAAGGAAGGAATTGGGAACA<br>CAAAGGGTGGGGGCAGGGGAGTTTGGGGCA<br>ACTGGTTGGAGGGGAAGGTGAAGTTCAATGAT<br>GCTCTTGATTTAATCCACATCATGTATCAC<br>TTTTTTCTTAAATAAAGAAGCCTGGGACACAG<br>TAGATAGACACACTTATCTTGGTTTGTCTTC<br>AGTTACTGAGGTAGGGATGGGAATATCCAAT<br>GCTCATACCCAAGTGACCCTGAAACTAAGGT<br>GCCATTTACACTCCTTAAGGTCACACAACATC<br>AGAGGGAGAGCTGGGATTGCAGCCAAGTTTA<br>TTTGTACAGGGCCCTGTGATAGGCTAGTTCC<br>CAAAGCCTGTGATGCAAGAACTTTTGCCCA<br>TAGACTCAGTCACCATGTAGCTGTTACCTGTT<br>CAGAGCTGGCTTTTTGCTTTCCACCCCTACTC<br>TGGAATTCTTAAATGGCTTTATACTTAGAAAT<br>CATCTTATTTCTGTTGAACCTAGATCACCCCA<br>ACCAGAACTTCTATTAATACTTTGTGCTTTCT<br>TGATACCAGGGTCTATTTGGTTTCCACTTAAG<br>GTTTTTGCATACTCTGCCATAAGTGA CT CAT<br>TAGTTACGGCCGCCAAAAGGGCGAATTCTG<br>CAGATATCCATCACACTG | gctctccatgc<br>attcaaactga<br>GG |

**Supplementary Table 7:** Homology arm sequences for donor integration. Guide sequences are mutated or interrupted by the donor cassette to prevent binding to homologous donors after integration. Mutated sequences and interrupted sequences are shown in lower case.

| Gene target | Primer | Region of amplification | Size | Sequence             |
|-------------|--------|-------------------------|------|----------------------|
| WNT5A       | F      | 5'                      |      | GCAGAAGTATTGGGGCTTGA |
| WNT5A       | R      | 5'                      |      | GCTTGGCTGGACGTAAACTC |
| WNT5A       | F      | 3'                      |      | ATTGCATCGCATTGTCTGAG |

|               |   |          |  |                          |
|---------------|---|----------|--|--------------------------|
| <i>WNT5A</i>  | R | 3'       |  | CAAAAGCAGAGGCAAACAAA     |
| <i>NKX6.1</i> | F | Cut site |  | CACGCTTTAGCAGCCTGAG      |
| <i>NKX6.1</i> | R | Cut site |  | CTAACTGGTGTGATTCCGGC     |
| <i>INS</i>    | R | 3'       |  | TTGCTACAGACCTGCTGCTC     |
| <i>OCT4</i>   | F | Cut site |  | GTA CTCTCGGTCCCTTTCC     |
| <i>OCT4</i>   | R | Cut site |  | CAAAAACCCTGGCACAACT      |
| <i>eCFP</i>   | F | Cloning  |  | CTAGGGAATTAATTCACAGCCACC |
| <i>eCFP</i>   | R | Cloning  |  | CGCGTAGAGTCGCGGTGATCTAGA |

**Supplementary Table 8:** List of primers used for NHEJ and integration assays. (eCFP: enhanced Cerulean fluorescent protein).

| Gene                  | Forward primer                         | Reverse primer                   |
|-----------------------|----------------------------------------|----------------------------------|
| <i>OCT3/4//POU5F1</i> | tgggctcgagaaggatgtg                    | gcatagtcgctgcttgatcg             |
| <i>NANOG</i>          | ttgggactggtggaagaatc                   | gatttgtggcctgaagaaa              |
| <i>REX1/ZFP42</i>     | aggatctcccacctttccaa                   | caggtagcacacctctctgc             |
| <i>LIN8</i>           | acccttccatgtgcagctta                   | tgtaagtggttcaacgtgcg             |
| <i>SOX2</i>           | agaaaaacgagggaaatggg                   | gtcatttgctgtgggtgatg             |
| <i>TERT</i>           | atcagccagtgccaggaactt                  | agctgacgtggaagatgagc             |
| <i>FOXA2/HNF3B</i>    | gctactcctccgtgagcaac                   | gggctcatggagttcatgtt             |
| <i>SOX17</i>          | ggcgcagcagaatccaga                     | ccacgactgcccagcat                |
| <i>GATA4</i>          | caggcgtgacagatagtg                     | cccgacaccccaatctc                |
| <i>HNF4A</i>          | catagcttgaccttcgagtg                   | cgtggtggacaagacaaga              |
| <i>CXCR4</i>          | caccgcatctggagaacca                    | gcccatttctcggttagtt              |
| <i>BRA/TBX1</i>       | gctgaagtgcacccctgc                     | agcgaggaggaaggggaac              |
| <i>GATA2</i>          | gccataagggtggtggtg                     | cacaagatgaatgggcagaa             |
| <i>RUNX1</i>          | caatggatcccaggattgg                    | ccactccactgccttaacc              |
| <i>HAND1</i>          | aatccttctcgcactgggc                    | cctcaaggctgaactcaaga             |
| <i>BRCA1</i>          | gaaggcccttctctggtt                     | agagtgcccattctgtctgga            |
| <i>BRCA2</i>          | acaaatagacgaaaggggca                   | gccccttcactcagcaaat              |
| <i>TUBB3</i>          | agtcgcccacgtagttgc                     | cgcccagtatgaggagat               |
| <i>NESTIN</i>         | tctttgctcccagtcctgag                   | gggctctgatctctgcatct             |
| <i>PAX6</i>           | tgtgtgctctgaaggctcagg                  | cctggagctctggttgaag              |
| <i>RAD51</i>          | ctggtggtctgtgtgaacg                    | ctgagggtacctttaggcca             |
| <i>RAD52</i>          | gctgtcacgtcctccaaga                    | cttcccctgtccatagcct              |
| <i>XRCC4</i>          | tggactgggacagtttctga                   | tcagttaccaacatattccc             |
| <i>XRCC5</i>          | tgaggaagcgagtaaccagctcataaat<br>cacatc | atgcagtctatgctcttataaaata<br>cg  |
| <i>XRCC6</i>          | agcactcagcaggttaaagctgaagctc<br>aac    | gattataaatgcccacagagatca<br>ctat |
| <i>LIG4</i>           | agcttgcccaggccaggttaaacga              | aaaaggaacgtgagatgcaaca           |
| <i>TBP</i>            | gttctgaataggctgtgggg                   | acaacagcctgccaccttac             |
| <i>ACTB</i>           | ccttgacatgccggag                       | gcacagagcctcgctt                 |
| 18s rRNA              | tcggaactgaggccatgatt                   | ctttcgctctggtccgtctt             |

**Supplementary Table 9:** List of primers used for qRT-PCR shown in Figure 5 and Supplementary Figure 5.

| Antigen | Supplier, species, catalog number | Dilution |
|---------|-----------------------------------|----------|
| OCT3/4  | SCBT, mouse, sc-5279              | 1:100    |
| SOX2    | SCBT, goat, sc-17320              | 1:100    |

|             |                              |       |
|-------------|------------------------------|-------|
| TRA1-81     | Abcam, mouse, 16289          | 1:200 |
| SSEA-4      | DSHB, mouse, MC-813-70       | 1:50  |
| SOX17       | R&D Systems, goat, AF1924    | 1:500 |
| FOXA2/HNF3B | Millipore, rabbit, 07-633    | 1:250 |
| PDX1        | R&D Systems, goat, AF2419    | 1:500 |
| CTNT        | Abcam, rabbit, ab45932       | 1:500 |
| NKX2.5      | DSHB, mouse, PCRP-NKX2-5-3B4 | 1:100 |

**Supplementary Table 10:** List of antibodies and dilutions used in Figure 5.

| Gene name     | # | Category     | H1 UT | H1 DMSO | H1 Noco | H1 ABT | HUES8 UT | HUES8 DMSO | HUES8 Noco | HUES8 ABT | DE    | CP    | NP    |
|---------------|---|--------------|-------|---------|---------|--------|----------|------------|------------|-----------|-------|-------|-------|
| <b>OCT4</b>   | 1 | pluripotency | 10.2  | 11.5    | 9.8     | 10.5   | 13.4     | 12         | 10.1       | 11        |       |       |       |
|               | 2 | pluripotency | 10.64 | 11.68   | 9.9     | 10.1   | 14.15    | 12.5       | 10.3       | 10.95     |       |       |       |
|               | 3 | pluripotency | 10.04 | 11.2    | 9.23    | 9.89   | 13.89    | 11.67      | 10.44      | 12.05     |       |       |       |
| <b>NANOG</b>  | 1 | pluripotency | 7.3   | 5.6     | 5.85    | 6.2    | 9.5      | 7.1        | 7.45       | 8.8       |       |       |       |
|               | 2 | pluripotency | 6.8   | 5       | 5.57    | 6.2    | 9.15     | 7.93       | 8.22       | 8.73      |       |       |       |
|               | 3 | pluripotency | 6.56  | 4.8     | 5.72    | 6.89   | 8.66     | 7.44       | 7.72       | 8.16      |       |       |       |
| <b>REX1</b>   | 1 | pluripotency | 4.1   | 4.56    | 3.99    | 4.53   | 4.6      | 4.4        | 4.73       | 4.21      |       |       |       |
|               | 2 | pluripotency | 4.22  | 4.67    | 4.13    | 4.38   | 4.17     | 4.84       | 5.01       | 4.44      |       |       |       |
|               | 3 | pluripotency | 4.78  | 4.8     | 4.42    | 5.01   | 4.06     | 4.25       | 4.66       | 4.92      |       |       |       |
| <b>GDF3</b>   | 1 | pluripotency | 7.28  | 7.8     | 7.94    | 7.1    | 6.54     | 6.32       | 7.04       | 6.22      |       |       |       |
|               | 2 | pluripotency | 6.9   | 8.12    | 7.28    | 6.92   | 6.93     | 7.93       | 8.11       | 8.73      |       |       |       |
|               | 3 | pluripotency | 6.67  | 7.74    | 7.92    | 6.19   | 7.05     | 7.44       | 7.72       | 8.16      |       |       |       |
| <b>LIN28</b>  | 1 | pluripotency | 9.3   | 9.6     | 8.85    | 10.2   | 9.5      | 9.1        | 8.45       | 8.8       |       |       |       |
|               | 2 | pluripotency | 9.8   | 9       | 8.97    | 11.1   | 9.15     | 8.93       | 8.11       | 8.73      |       |       |       |
|               | 3 | pluripotency | 8.56  | 8.4     | 7.52    | 8.89   | 8.66     | 8.77       | 9.72       | 8.16      |       |       |       |
| <b>FOXA2</b>  | 1 | endoderm     | 1.23  | 1.5     | 1.2     | 1.74   | 1.45     | 1.67       | 1.74       | 1.85      | 159.1 |       |       |
|               | 2 | endoderm     | 1.11  | 1.22    | 1.05    | 1.64   | 1.43     | 1.84       | 1.6        | 1.65      | 147   |       |       |
|               | 3 | endoderm     | 1.37  | 1.56    | 1.15    | 1.8    | 1.69     | 1.62       | 1.63       | 1.48      | 161   |       |       |
| <b>GATA4</b>  | 1 | endoderm     | 1.6   | 1.32    | 1.3     | 1.1    | 1.1      | 0.96       | 0.76       | 1.03      | 53.8  |       |       |
|               | 2 | endoderm     | 1.41  | 1.25    | 1.45    | 1.02   | 0.98     | 0.88       | 0.64       | 1.14      | 58.1  |       |       |
|               | 3 | endoderm     | 1.66  | 1.28    | 1.27    | 1.16   | 1.24     | 1.19       | 0.75       | 0.99      | 56.7  |       |       |
| <b>CXCR4</b>  | 1 | endoderm     | 2.4   | 3       | 2.68    | 2.11   | 1.43     | 1.77       | 1.94       | 1.88      | 66.1  |       |       |
| <b>SOX17</b>  | 1 | endoderm     | 1.8   | 2.5     | 2.89    | 1.5    | 2.4      | 2.71       | 2.89       | 2.16      | 127.8 |       |       |
|               | 2 | endoderm     | 1.96  | 2.08    | 2.89    | 1.75   | 2.2      | 2.65       | 2.51       | 2.37      | 144.3 |       |       |
|               | 3 | endoderm     | 2.08  | 2.89    | 2.41    | 1.88   | 2.11     | 2.43       | 2.18       | 2.02      | 125   |       |       |
| <b>BRA(T)</b> | 1 | mesoderm     | 1.96  | 2.28    | 2.14    | 2.35   | 1.67     | 1.99       | 2.12       | 2.11      |       | 43    |       |
|               | 2 | mesoderm     | 1.85  | 2.49    | 2.15    | 2.22   | 1.59     | 2.11       | 2.36       | 2.18      |       | 48.11 |       |
|               | 3 | mesoderm     | 2.15  | 2.51    | 1.99    | 2.21   | 1.42     | 1.94       | 2.56       | 2.74      |       | 51.95 |       |
| <b>TPNT</b>   | 1 | mesoderm     | 1.45  | 1.85    | 1.77    | 2.19   | 2.05     | 1.78       | 1.81       | 1.99      |       | 85.64 |       |
|               | 2 | mesoderm     | 1.84  | 2.00    | 2.14    | 1.68   | 1.93     | 2.39       | 2.3        | 1.73      |       | 81.5  |       |
|               | 3 | mesoderm     | 1.42  | 1.67    | 1.94    | 1.99   | 1.72     | 2.19       | 2.3        | 2.16      |       | 81.44 |       |
| <b>NKX2.5</b> | 1 | mesoderm     | 0.78  | 1.29    | 1.11    | 1.21   | 0.93     | 1.25       | 0.72       | 1.33      |       | 93.6  |       |
|               | 2 | mesoderm     | 1.15  | 1.37    | 1.25    | 1.34   | 1.17     | 1.03       | 0.69       | 1.19      |       | 99.7  |       |
|               | 3 | mesoderm     | 1.02  | 1.56    | 1.73    | 0.69   | 0.97     | 0.85       | 1.13       | 1.41      |       | 98.1  |       |
| <b>PAX6</b>   | 1 | ectoderm     | 2.11  | 2.50    | 2.74    | 2.91   | 2.60     | 3.15       | 2.74       | 3.01      |       |       | 171.9 |
|               | 2 | ectoderm     | 2.84  | 3.07    | 3.11    | 2.67   | 3.50     | 2.93       | 2.93       | 2.45      |       |       | 168.5 |
|               | 3 | ectoderm     | 2.88  | 3.67    | 3.21    | 3.00   | 3.24     | 2.86       | 2.61       | 2.88      |       |       | 170.2 |
| <b>SOX1</b>   | 1 | ectoderm     | 1.67  | 1.84    | 1.93    | 1.52   | 1.67     | 1.89       | 2.15       | 2.28      |       |       | 72.4  |
|               | 2 | ectoderm     | 2.51  | 1.11    | 1.78    | 1.46   | 2.02     | 2.06       | 1.83       | 2.51      |       |       | 72.1  |
|               | 3 | ectoderm     | 2.55  | 1.44    | 1.72    | 1.62   | 2.04     | 2.23       | 2.33       | 1.85      |       |       | 67.8  |

**Supplementary Table 11: Synchronized cells have similar gene expression patterns to unsynchronized cells.** qPCR values shown for three replicates.
